# Supplementary material
Source: PubMed Central journal article supplement (PMC6669904)
Supplement: NIHMS1512002-supplement-1.pdf [file NIHMS1512002-supplement-1.pdf]

## SUPPLEMENTARY DATA

**Supplementary Table S1.** Allele frequency

| <b>Locus</b>               | <b>Allele</b> | <b>Count</b> | <b>Proportion</b> | <b>95% CI</b> |
|----------------------------|---------------|--------------|-------------------|---------------|
| <i>VEGFA / rs699947</i>    | A             | 269          | 0.470             | (0.429–0.512) |
|                            | C             | 303          | 0.530             | (0.488–0.571) |
| <i>VEGFA / rs833061</i>    | C             | 272          | 0.476             | (0.434–0.517) |
|                            | T             | 300          | 0.524             | (0.483–0.566) |
| <i>VEGFR1 / rs9554320</i>  | A             | 228          | 0.399             | (0.358–0.440) |
|                            | C             | 344          | 0.601             | (0.560–0.642) |
| <i>VEGFR1 / rs9582036</i>  | C             | 165          | 0.288             | (0.252–0.327) |
|                            | A             | 407          | 0.712             | (0.673–0.748) |
| <i>VEGFR2 / rs2071559</i>  | T             | 312          | 0.545             | (0.504–0.587) |
|                            | C             | 260          | 0.455             | (0.413–0.496) |
| <i>VEGFR2 / rs1870377</i>  | A             | 130          | 0.227             | (0.194–0.264) |
|                            | T             | 442          | 0.773             | (0.736–0.806) |
| <i>VEGFR3 / rs6877011</i>  | C             | 520          | 0.909             | (0.882–0.931) |
|                            | G             | 52           | 0.091             | (0.069–0.118) |
| <i>LOXL2 / rs4872122</i>   | A             | 232          | 0.406             | (0.365–0.447) |
|                            | C             | 340          | 0.594             | (0.553–0.635) |
| <i>eNOS / rs2070744</i>    | T             | 365          | 0.638             | (0.597–0.678) |
|                            | C             | 207          | 0.362             | (0.322–0.403) |
| <i>SH3GL2 / rs10963287</i> | C             | 429          | 0.750             | (0.712–0.785) |

---

|                                   |     |       |               |               |
|-----------------------------------|-----|-------|---------------|---------------|
| T                                 | 143 | 0.250 | (0.215–0.288) |               |
| <i>CCDC26</i> / <i>rs60315789</i> | –   | 267   | 0.467         | (0.425–0.509) |
| TAT                               | 305 | 0.533 | (0.491–0.575) |               |

---

Abbreviations: CI, confidence interval; SNP, single nucleotide polymorphism; VEGFR, VEGF receptor.
