# Supplementary material
Source: PubMed Central journal article supplement (PMC6669904)
Supplement: NIHMS1512002-supplement-2.pdf [file NIHMS1512002-supplement-2.pdf]

**Supplementary Table S2.** Genotype frequency

| <b>Locus</b>              | <b>Genotype</b> | <b>Count</b> | <b>Proportion</b> | <b>95% CI</b> |
|---------------------------|-----------------|--------------|-------------------|---------------|
| <i>VEGFA / rs699947</i>   | A/A             | 61           | 0.213             | (0.167–0.265) |
|                           | A/C             | 147          | 0.514             | (0.454–0.573) |
|                           | C/C             | 78           | 0.273             | (0.222–0.328) |
| <i>VEGFA / rs833061</i>   | C/C             | 61           | 0.213             | (0.167–0.265) |
|                           | C/T             | 150          | 0.524             | (0.465–0.584) |
|                           | T/T             | 75           | 0.262             | (0.212–0.317) |
| <i>VEGFR1 / rs9554320</i> | A/A             | 40           | 0.140             | (0.102–0.186) |
|                           | A/C             | 148          | 0.517             | (0.458–0.577) |
|                           | C/C             | 98           | 0.343             | (0.288–0.401) |
| <i>VEGFR1 / rs9582036</i> | C/C             | 20           | 0.070             | (0.043–0.106) |
|                           | C/A             | 125          | 0.437             | (0.379–0.497) |
|                           | A/A             | 141          | 0.493             | (0.434–0.553) |
| <i>VEGFR2 / rs2071559</i> | T/T             | 88           | 0.308             | (0.255–0.365) |
|                           | T/C             | 136          | 0.476             | (0.416–0.535) |
|                           | C/C             | 62           | 0.217             | (0.170–0.269) |
| <i>VEGFR2 / rs1870377</i> | A/A             | 22           | 0.077             | (0.049–0.114) |
|                           | A/T             | 86           | 0.301             | (0.248–0.357) |
|                           | T/T             | 178          | 0.622             | (0.563–0.679) |
| <i>VEGFR3 / rs6877011</i> | C/C             | 242          | 0.846             | (0.799–0.886) |
|                           | C/G             | 36           | 0.126             | (0.090–0.170) |

|                            |         |     |       |               |
|----------------------------|---------|-----|-------|---------------|
|                            | G/G     | 8   | 0.028 | (0.012–0.054) |
| <i>LOXL2 / rs4872122</i>   | A/A     | 50  | 0.175 | (0.133–0.224) |
|                            | A/C     | 132 | 0.462 | (0.403–0.521) |
|                            | C/C     | 104 | 0.364 | (0.308–0.422) |
| <i>eNOS / rs2070744</i>    | T/T     | 115 | 0.402 | (0.345–0.461) |
|                            | T/C     | 135 | 0.472 | (0.413–0.532) |
|                            | C/C     | 36  | 0.126 | (0.090–0.170) |
| <i>SH3GL2 / rs10963287</i> | C/C     | 165 | 0.577 | (0.517–0.635) |
|                            | C/T     | 99  | 0.346 | (0.291–0.404) |
|                            | T/T     | 22  | 0.077 | (0.049–0.114) |
| <i>CCDC26 / rs60315789</i> | –/–     | 63  | 0.220 | (0.174–0.273) |
|                            | –/TAT   | 141 | 0.493 | (0.434–0.553) |
|                            | TAT/TAT | 82  | 0.287 | (0.235–0.343) |

Abbreviations: CI, confidence interval; SNP, single nucleotide polymorphism; VEGFR,

VEGF receptor.
