# Supplementary material
Source: PubMed Central journal article supplement (PMC6669904)
Supplement: NIHMS1512002-supplement-3.pdf [file NIHMS1512002-supplement-3.pdf]

**Supplementary Table S3.** Association between DFS and genotype subgroups within each treatment group or the combined sunitinib and placebo groups

| <b>Gene/SNP</b>         | <b>Sunitinib<sup>a</sup></b> |               | <b>Placebo<sup>b</sup></b> |               | <b>Combined<sup>c</sup></b> |               |
|-------------------------|------------------------------|---------------|----------------------------|---------------|-----------------------------|---------------|
| <i>VEGFA rs699947</i>   | A/C                          | C/C           | A/C                        | C/C           | A/C                         | C/C           |
|                         | <i>n</i> = 78                | <i>n</i> = 37 | <i>n</i> = 69              | <i>n</i> = 41 | <i>n</i> = 147              | <i>n</i> = 78 |
| HR                      | 0.94                         | 1.19          | 1.19                       | 1.14          | 1.05                        | 1.17          |
| 95% CI                  | (0.42–2.08)                  | (0.51–2.82)   | (0.63–2.24)                | (0.57–2.25)   | (0.64–1.71)                 | (0.68–1.99)   |
| <i>P</i> value          | 0.789                        | 0.671         | 0.599                      | 0.734         | 0.933                       | 0.596         |
| <i>VEGFA rs833061</i>   | C/T                          | T/T           | C/T                        | T/T           | C/T                         | T/T           |
|                         | <i>n</i> = 80                | <i>n</i> = 35 | <i>n</i> = 70              | <i>n</i> = 40 | <i>n</i> = 150              | <i>n</i> = 75 |
| HR                      | 0.96                         | 1.16          | 1.22                       | 1.09          | 1.07                        | 1.13          |
| 95% CI                  | (0.44–2.11)                  | (0.49–2.77)   | (0.65–2.29)                | (0.55–2.18)   | (0.66–1.74)                 | (0.66–1.94)   |
| <i>P</i> value          | 0.855                        | 0.741         | 0.507                      | 0.851         | 0.814                       | 0.719         |
| <i>VEGFR1 rs9554320</i> | A/C                          | C/C           | A/C                        | C/C           | A/C                         | C/C           |
|                         | <i>n</i> = 72                | <i>n</i> = 50 | <i>n</i> = 76              | <i>n</i> = 48 | <i>n</i> = 148              | <i>n</i> = 98 |
| HR                      | 1.44                         | 0.59          | 2.16                       | 1.74          | 1.82                        | 1.08          |

|                         |                  |               |               |               |                  |                |
|-------------------------|------------------|---------------|---------------|---------------|------------------|----------------|
| 95% CI                  | (0.56–3.70)      | (0.21–1.71)   | (0.96–4.86)   | (0.74–4.11)   | (0.99–3.36)      | (0.56–2.10)    |
| <i>P</i> value          | 0.051            | 0.068         | <b>0.038</b>  | 0.515         | <b>0.006</b>     | 0.454          |
| <i>VEGFR1 rs9582036</i> | C/A              | A/A           | C/A           | A/A           | C/A              | A/A            |
|                         | <i>n</i> = 55    | <i>n</i> = 77 | <i>n</i> = 70 | <i>n</i> = 64 | <i>n</i> = 125   | <i>n</i> = 141 |
| HR                      | 4.17             | 1.52          | 2.83          | 1.80          | 3.16             | 1.55           |
| 95% CI                  | (0.57–30.60)     | (0.20–11.36)  | (0.87–9.28)   | (0.54–5.97)   | (1.15–8.69)      | (0.56–4.32)    |
| <i>P</i> value          | <b>&lt;0.001</b> | <b>0.022</b>  | <b>0.027</b>  | 0.774         | <b>&lt;0.001</b> | <b>0.072</b>   |
| <i>VEGFR2 rs2071559</i> | T/C              | C/C           | T/C           | C/C           | T/C              | C/C            |
|                         | <i>n</i> = 68    | <i>n</i> = 26 | <i>n</i> = 68 | <i>n</i> = 36 | <i>n</i> = 136   | <i>n</i> = 62  |
| HR                      | 1.38             | 1.71          | 0.60          | 1.11          | 0.90             | 1.39           |
| 95% CI                  | (0.71–2.66)      | (0.76–3.85)   | (0.34–1.06)   | (0.59–2.10)   | (0.59–1.39)      | (0.84–2.29)    |
| <i>P</i> value          | 0.352            | 0.219         | 0.070         | 0.956         | 0.582            | 0.309          |
| <i>VEGFR2 rs1870377</i> | A/T              | T/T           | A/T           | T/T           | A/T              | T/T            |
|                         | <i>n</i> = 46    | <i>n</i> = 89 | <i>n</i> = 40 | <i>n</i> = 89 | <i>n</i> = 86    | <i>n</i> = 178 |
| HR                      | –                | –             | 0.83          | 0.69          | 0.69             | 0.53           |
| 95% CI                  | –                | –             | (0.37–1.88)   | (0.32–1.50)   | (0.36–1.32)      | (0.28–0.98)    |

|                         |               |               |               |               |                |                |
|-------------------------|---------------|---------------|---------------|---------------|----------------|----------------|
| <i>P</i> value          | –             | –             | 0.807         | 0.198         | 0.837          | <b>0.018</b>   |
| <i>VEGFR3 rs6877011</i> | C/G           | G/G           | C/G           | G/G           | C/G            | G/G            |
|                         | <i>n</i> = 16 | <i>n</i> = 5  | <i>n</i> = 20 | <i>n</i> = 3  | <i>n</i> = 36  | <i>n</i> = 8   |
| HR                      | –             | –             | –             | –             | –              | –              |
| 95% CI                  | –             | –             | –             | –             | –              | –              |
| <i>P</i> value          | –             | –             | –             | –             | –              | –              |
| <i>LOXL2 rs4872122</i>  | A/C           | C/C           | A/C           | C/C           | A/C            | C/C            |
|                         | <i>n</i> = 59 | <i>n</i> = 59 | <i>n</i> = 73 | <i>n</i> = 45 | <i>n</i> = 132 | <i>n</i> = 104 |
| HR                      | 0.73          | 0.58          | 0.81          | 0.65          | 0.78           | 0.61           |
| 95% CI                  | (0.36–1.51)   | (0.28–1.22)   | (0.43–1.50)   | (0.33–1.32)   | (0.49–1.24)    | (0.37–1.01)    |
| <i>P</i> value          | 0.461         | 0.221         | 0.724         | 0.216         | 0.514          | 0.060          |
| <i>eNOS rs2070744</i>   | T/C           | C/C           | T/C           | C/C           | T/C            | C/C            |
|                         | <i>n</i> = 65 | <i>n</i> = 22 | <i>n</i> = 70 | <i>n</i> = 14 | <i>n</i> = 135 | <i>n</i> = 36  |
| HR                      | 1.18          | 0.85          | 0.67          | 0.49          | 0.85           | 0.61           |
| 95% CI                  | (0.64–2.15)   | (0.34–2.12)   | (0.40–1.11)   | (0.19–1.27)   | (0.58–1.25)    | (0.32–1.17)    |
| <i>P</i> value          | 0.596         | 0.920         | 0.114         | 0.065         | 0.405          | 0.137          |

|                          |               |               |               |               |                |               |
|--------------------------|---------------|---------------|---------------|---------------|----------------|---------------|
| <i>SH3GL2 rs10963287</i> | C/T           | T/T           | C/T           | T/T           | C/T            | T/T           |
|                          | <i>n</i> = 46 | <i>n</i> = 11 | <i>n</i> = 53 | <i>n</i> = 11 | <i>n</i> = 99  | <i>n</i> = 22 |
| HR                       | 0.70          | 1.53          | 1.08          | 1.22          | 0.92           | 1.40          |
| 95% CI                   | (0.36–1.35)   | (0.59–3.98)   | (0.65–1.79)   | (0.51–2.91)   | (0.62–1.38)    | (0.74–2.66)   |
| <i>P</i> value           | 0.339         | 0.996         | 0.768         | 0.631         | 0.742          | 0.618         |
| <i>CCDC26 rs60315789</i> | –/TAT         | TAT/TAT       | –/TAT         | TAT/TAT       | –/TAT          | TAT/TAT       |
|                          | <i>n</i> = 71 | <i>n</i> = 42 | <i>n</i> = 70 | <i>n</i> = 40 | <i>n</i> = 141 | <i>n</i> = 82 |
| HR                       | 1.52          | 1.84          | 1.20          | 0.95          | 1.35           | 1.26          |
| 95% CI                   | (0.70–3.29)   | (0.82–4.13)   | (0.66–2.20)   | (0.47–1.92)   | (0.83–2.17)    | (0.74–2.13)   |
| <i>P</i> value           | 0.432         | 0.123         | 0.481         | 0.869         | 0.264          | 0.380         |

HRs calculated using the unstratified Cox proportional hazards model for heterozygous vs. homozygous genotypes. Two-sided *P* value from the unstratified log rank test.

<sup>a</sup> Sunitinib group (homozygous genotypes): *n* = 27 (*VEGF A rs699947 A/A*); *n* = 27 (*VEGF A rs833061 C/C*); *n* = 20 (*VEGFR1 rs9554320 A/A*); *n* = 10 (*VEGFR1 rs9582036 C/C*); *n* = 48 (*VEGFR2 rs2071559 T/T*); *n* = 7 (*VEGFR2 rs1870377 A/A*); *n* = 121 (*VEGFR3 rs6877011 C/C*); *n* = 24 (*LOXL2 rs4872122 A/A*); *n* = 55 (*eNOS rs2070744 T/T*); *n* = 85 (*SH3GL2 rs10963287 C/C*); *n* = 29 (*CCDC26 rs60315789 –/–*).

<sup>b</sup> Placebo group (homozygous genotypes):  $n = 34$  (*VEGF A rs699947 A/A*);  $n = 34$  (*VEGF A rs833061 C/C*);  $n = 20$  (*VEGFR1 rs9554320 A/A*);  $n = 10$  (*VEGFR1 rs9582036 C/C*);  $n = 40$  (*VEGFR2 rs2071559 T/T*);  $n = 15$  (*VEGFR2 rs1870377 A/A*);  $n = 121$  (*VEGFR3 rs6877011 C/C*);  $n = 26$  (*LOXL2 rs4872122 A/A*);  $n = 60$  (*eNOS rs2070744 T/T*);  $n = 80$  (*SH3GL2 rs10963287 C/C*);  $n = 34$  (*CCDC26 rs60315789 -/-*).

<sup>c</sup> Combined group (homozygous genotypes):  $n = 61$  (*VEGF A rs699947 A/A*);  $n = 61$  (*VEGF A rs833061 C/C*);  $n = 40$  (*VEGFR1 rs9554320 A/A*);  $n = 20$  (*VEGFR1 rs9582036 C/C*);  $n = 88$  (*VEGFR2 rs2071559 T/T*);  $n = 22$  (*VEGFR2 rs1870377 A/A*);  $n = 242$  (*VEGFR3 rs6877011 C/C*);  $n = 50$  (*LOXL2 rs4872122 A/A*);  $n = 115$  (*eNOS rs2070744 T/T*);  $n = 165$  (*SH3GL2 rs10963287 C/C*);  $n = 63$  (*CCDC26 rs60315789 -/-*).

Abbreviations: CI=confidence interval; DFS=disease-free survival; SNP=single nucleotide polymorphism; VEGFR=VEGF receptor.
