# Supplementary material
Source: PubMed Central journal article supplement (PMC6669904)
Supplement: NIHMS1512002-supplement-4.pdf [file NIHMS1512002-supplement-4.pdf]

**Supplementary Table S4.** Comparison of OS stratified by genotype and treatment group

| <b>Gene/SNP</b>         | <b>Sunitinib vs Placebo: HR (95% CI); P unadjusted</b> |                   |                   |
|-------------------------|--------------------------------------------------------|-------------------|-------------------|
| <i>VEGFA rs699947</i>   | A/A                                                    | A/C               | C/C               |
|                         | 0.86 (0.29–2.57);                                      | 1.29 (0.62–2.70); | 1.01 (0.39–2.61); |
|                         | 0.786                                                  | 0.498             | 0.990             |
| <i>VEGFA rs833061</i>   | C/C                                                    | C/T               | T/T               |
|                         | 0.86 (0.29–2.57);                                      | 1.25 (0.61–2.54); | 1.01 (0.37–2.79); |
|                         | 0.786                                                  | 0.544             | 0.982             |
| <i>VEGFR1 rs9554320</i> | A/A                                                    | A/C               | C/C               |
|                         | 2.26 (0.49–10.35);                                     | 1.01 (0.53–1.93); | 1.04 (0.39–2.78); |
|                         | 0.283                                                  | 0.973             | 0.931             |
| <i>VEGFR1 rs9582036</i> | C/C                                                    | C/A               | A/A               |
|                         | 5.00 (0.51–48.63);                                     | 1.04 (0.50–2.13); | 1.08 (0.49–2.38); |
|                         | 0.125                                                  | 0.926             | 0.850             |
| <i>VEGFR2 rs2071559</i> | T/T                                                    | T/C               | C/C               |
|                         | 0.77 (0.28–2.13);                                      | 1.18 (0.57–2.45); | 1.42 (0.53–3.79); |
|                         | 0.614                                                  | 0.654             | 0.479             |
| <i>VEGFR2 rs1870377</i> | A/A                                                    | A/T               | T/T               |
|                         | –                                                      | 1.45 (0.58–3.60); | 0.88 (0.47–1.66); |
|                         |                                                        | 0.424             | 0.694             |
| <i>VEGFR3 rs6877011</i> | C/C                                                    | C/G               | G/G               |
|                         | 1.12 (0.65–1.93);                                      | 1.68 (0.37–7.52); | –                 |
|                         | 0.686                                                  | 0.494             |                   |
| <i>LOXL2 rs4872122</i>  | A/A                                                    | A/C               | C/C               |

|                          |                   |                   |                    |
|--------------------------|-------------------|-------------------|--------------------|
|                          | 0.52 (0.15–1.77); | 1.45 (0.70–3.01); | 1.14 (0.46–2.79);  |
|                          | 0.284             | 0.314             | 0.777              |
| <i>eNOS rs2070744</i>    | T/T               | T/C               | C/C                |
|                          | 1.17 (0.52–2.60); | 1.14 (0.57–2.27); | 0.77 (0.11–5.48);  |
|                          | 0.705             | 0.720             | 0.795              |
| <i>SH3GL2 rs10963287</i> | C/C               | C/T               | T/T                |
|                          | 1.19 (0.59–2.42); | 0.87 (0.39–1.97); | 1.96 (0.33–11.75); |
|                          | 0.625             | 0.747             | 0.455              |
| <i>CCDC26 rs60315789</i> | –/–               | –/TAT             | TAT/TAT            |
|                          | 0.68 (0.16–2.86); | 1.04 (0.54–2.02); | 1.44 (0.55–3.79);  |
|                          | 0.600             | 0.908             | 0.456              |

HRs calculated using the unstratified Cox proportional hazards model. Two-sided *P* value from the unstratified log rank test.

Abbreviations: CI=confidence interval; DFS=disease-free survival; SNP=single nucleotide polymorphism; VEGFR=VEGF receptor.
